# Supplementary material for: Supporting the Identification of Novel Fragment-Based Positive Allosteric Modulators Using a Supervised Molecular Dynamics Approach: A Retrospective Analysis Considering the Human A2A Adenosine Receptor as a Key Example
Source: MDPI journal article supplement (doi:10.3390/molecules22050818), 2017-05-16
Supplement: s1 [file s1]

# Supplementary Materials: Supporting the identification of novel fragment-based positive allosteric modulators using a supervised molecular dynamics approach: a retrospective analysis considering the human A2A adenosine receptor as a key study

Giuseppe Deganutti and Stefano Moro

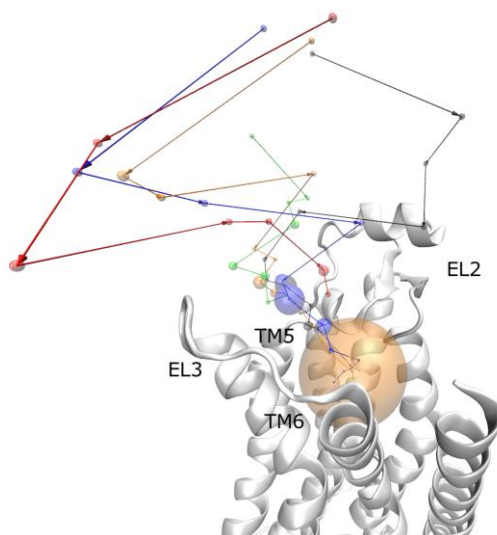

**Figure S1.** ZB1854 - A<sub>2A</sub> AR (apo form) recognition pathways, obtained from five SuMD simulation replicas. Replica 1 is red color coded; replica 2 is blue color coded; replica 3 is green color coded; replica 4 is orange color coded; replica 5 is black color coded.

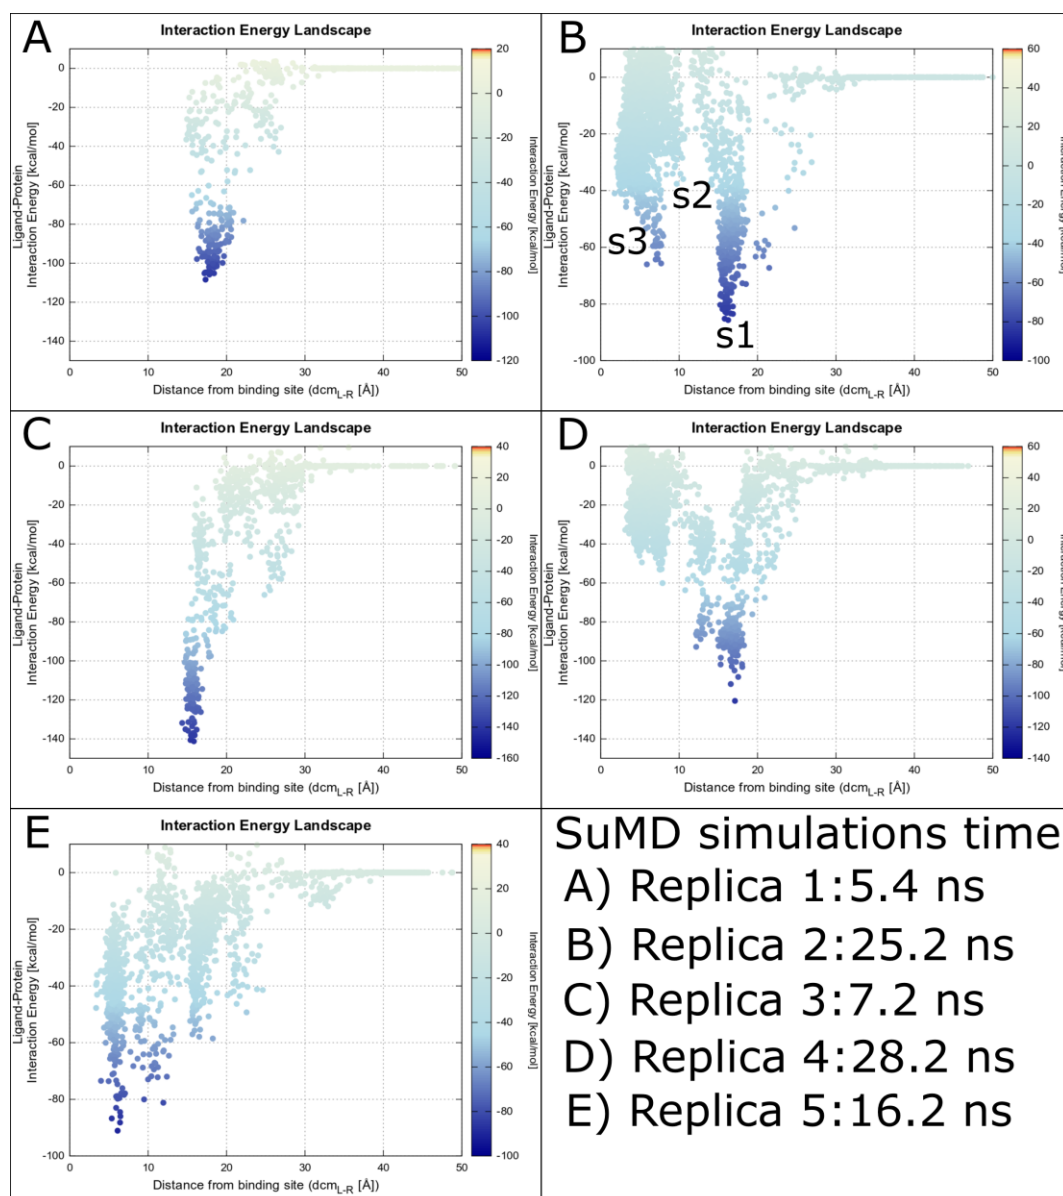

**Figure S2.** ZB1854 - A<sub>2A</sub> AR (apo form) recognition energy landscapes for the five SuMD replicas performed. On the x axis is reported the ligand distance from the orthosteric site, while the y axis shows the intermolecular interaction extracted from the force field (computed every 10 ps of simulation). **(A)** Replica 1; **(B)** replica 2 (S1 meta-stable state, S2 unfavorable state, S3 pseudo-orthosteric state); **(C)** replica 3; **(D)** replica 4; **(E)** replica 5.

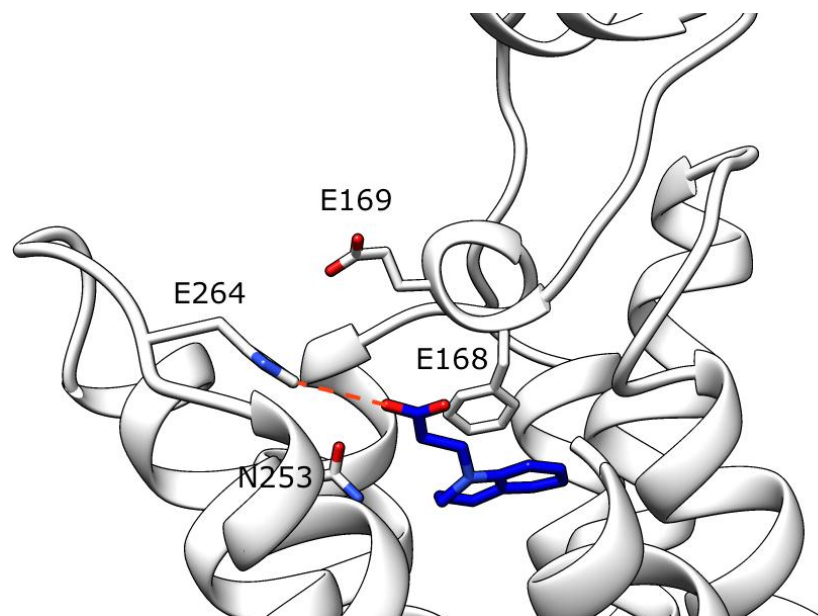

**Figure S3.** Compound ZB1854 at the end of SuMD replica 5 (on A<sub>2A</sub> AR apo form). The fragment electrostatically interacts with H264 (EL3) and makes hydrophobic contacts with F168 (EL2).

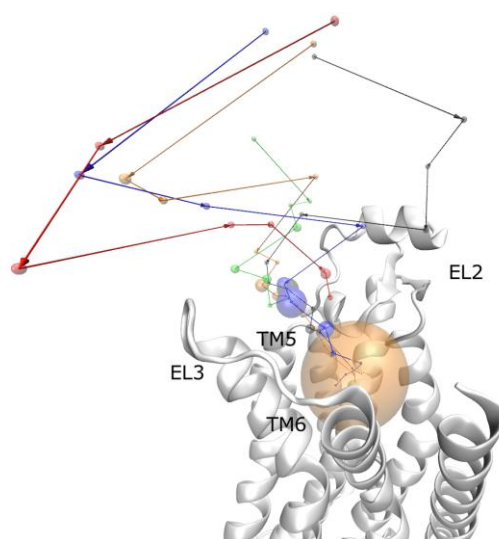

**Figure S4.** Caffeine - A<sub>2A</sub> AR recognition pathways obtained from five SuMD simulation replicas. Replica 1 is red color coded; replica 2 is blue color coded; replica 3 is green color coded; replica 4 is orange color coded; replica 5 is black color coded.

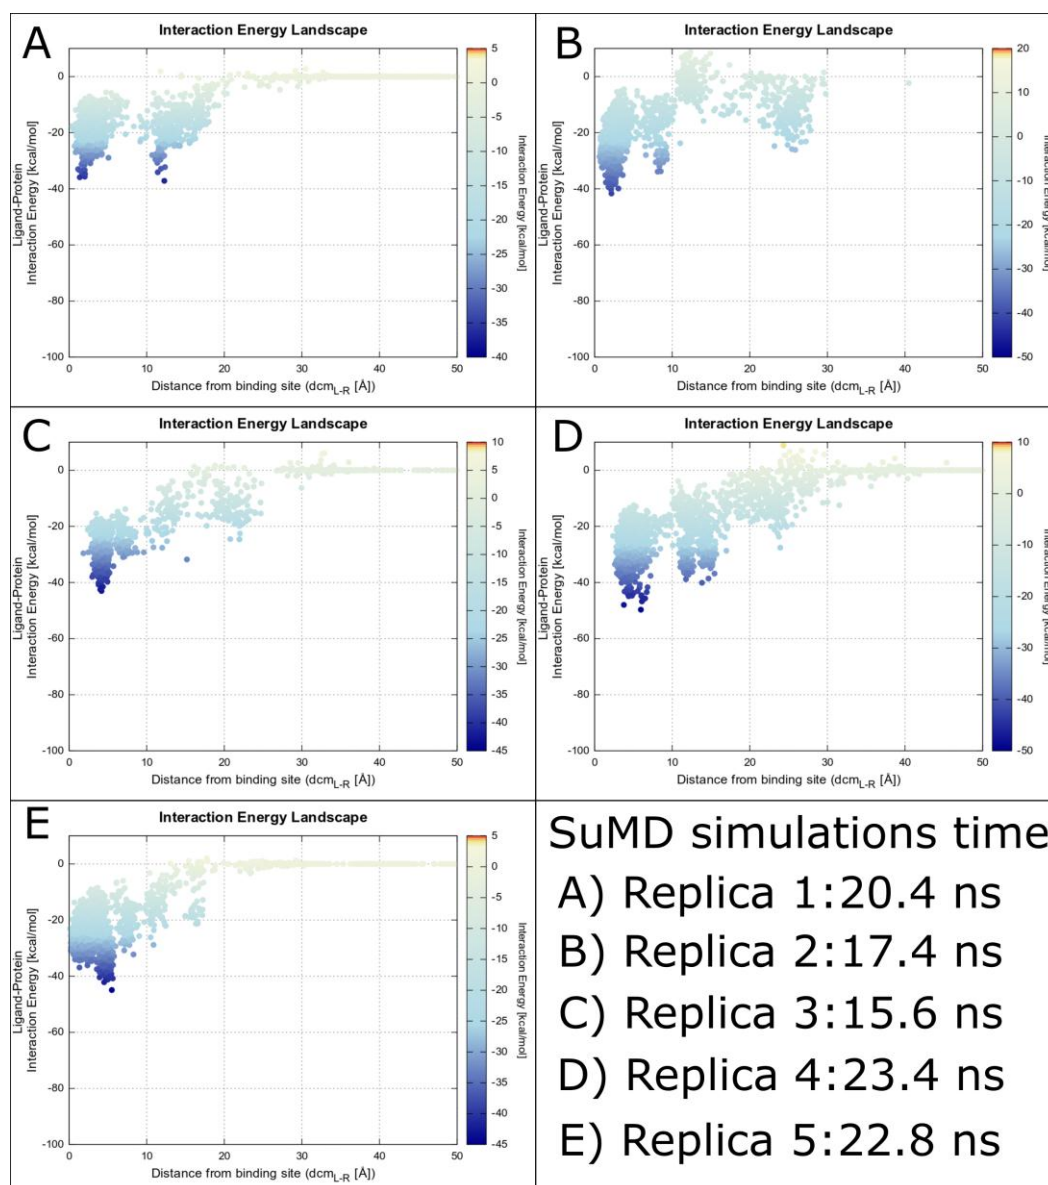

**Figure S5.** Caffeine - A<sub>2A</sub> AR (apo form) recognition energy landscapes for the five SuMD replicas performed. On the x axis is reported the ligand distance from the orthosteric site, while the y axis shows the intermolecular interaction extracted from the force field (computed every 10 ps of simulation). **(A)** Replica 1; **(B)** replica 2; **(C)** replica 3; **(D)** replica 4; **(E)** replica 5.

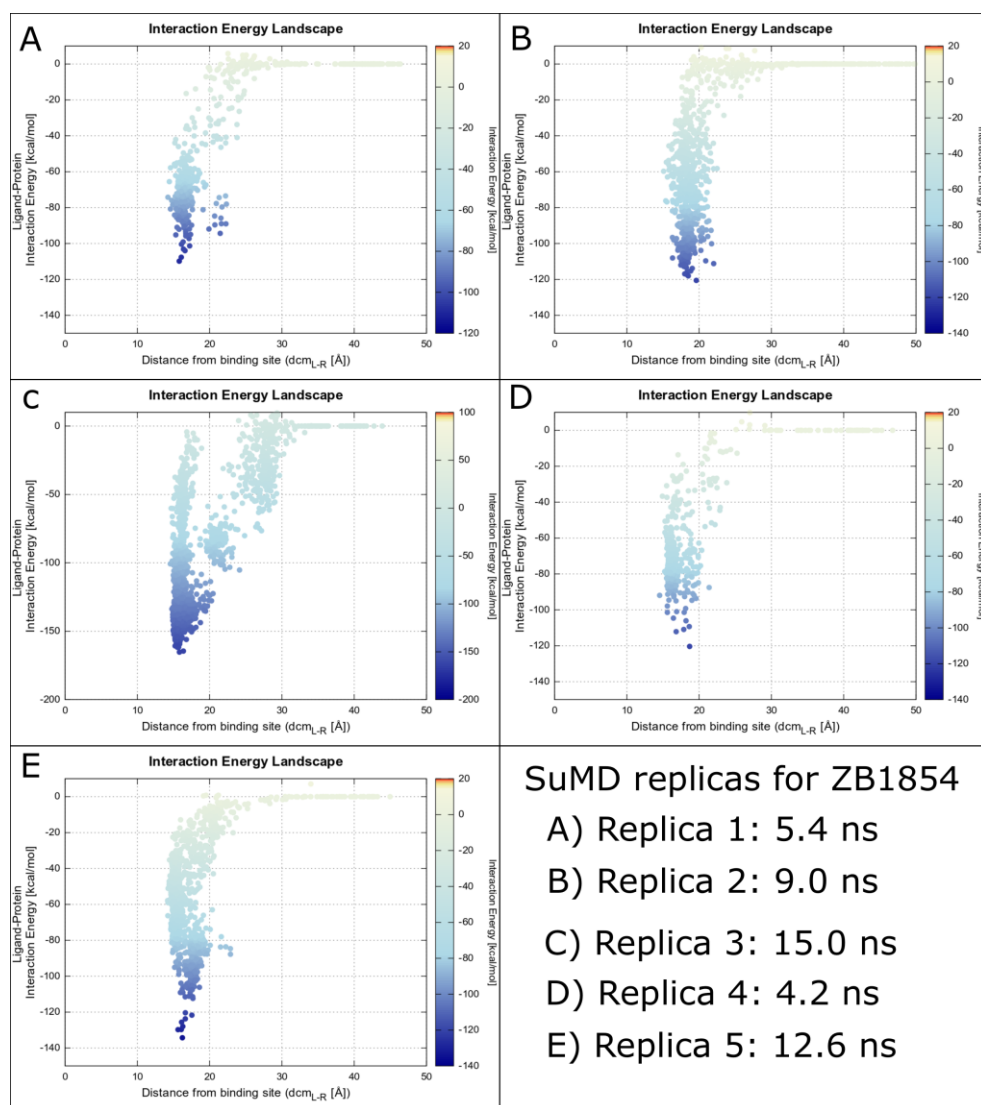

**Figure S6.** ZB1854 - A<sub>2A</sub> AR (holo form) recognition energy landscapes for the five SuMD replicas performed. On the x axis is reported the ligand distance from the orthosteric site, while the y axis shows the intermolecular interaction extracted from the force field (computed every 10 ps of simulation). **(A)** Replica 1; **(B)** replica 2; **(C)** replica 3; **(D)** replica 4; **(E)** replica 5.

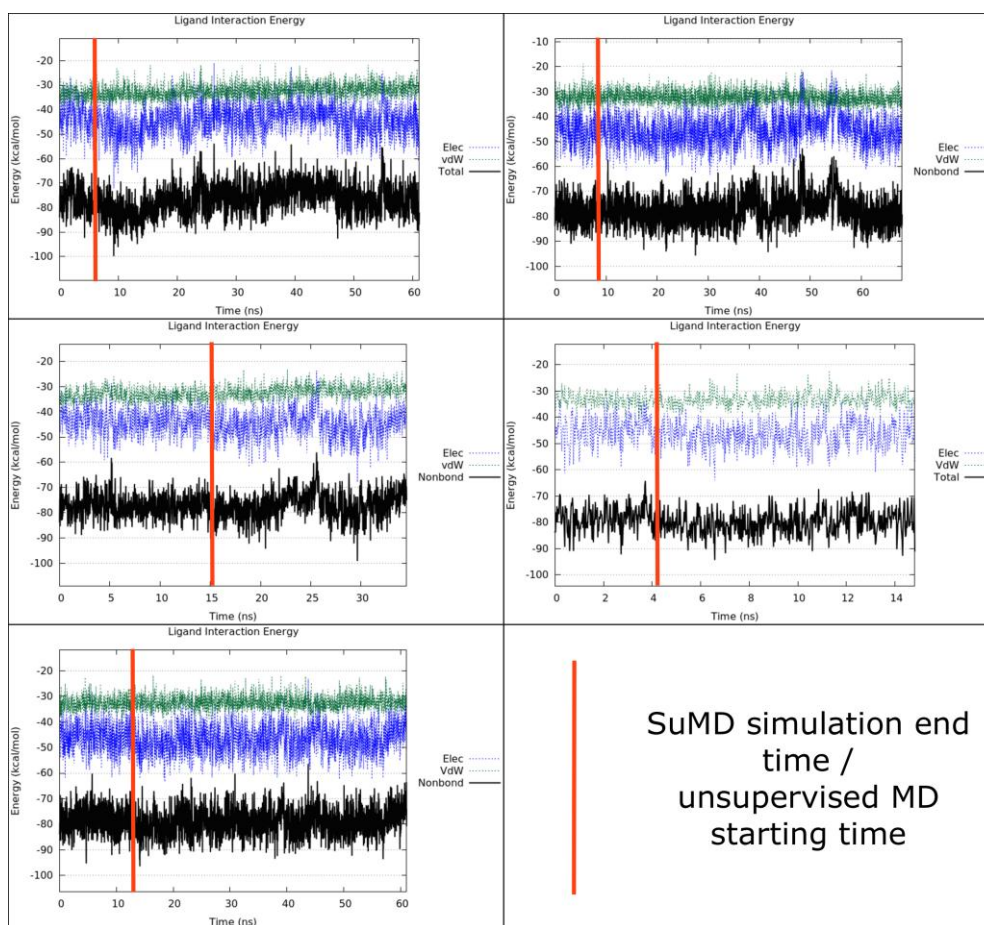

**Figure S7.** NECA - A<sub>2A</sub> AR (holo form) orthosteric interactions during SuMD and unsupervised MD simulations of ZB1854. Red lines indicate the end of the supervision algorithm. (A) Replica 1; (B) replica 2; (C) replica 3; (D) replica 4; (E) replica 5.



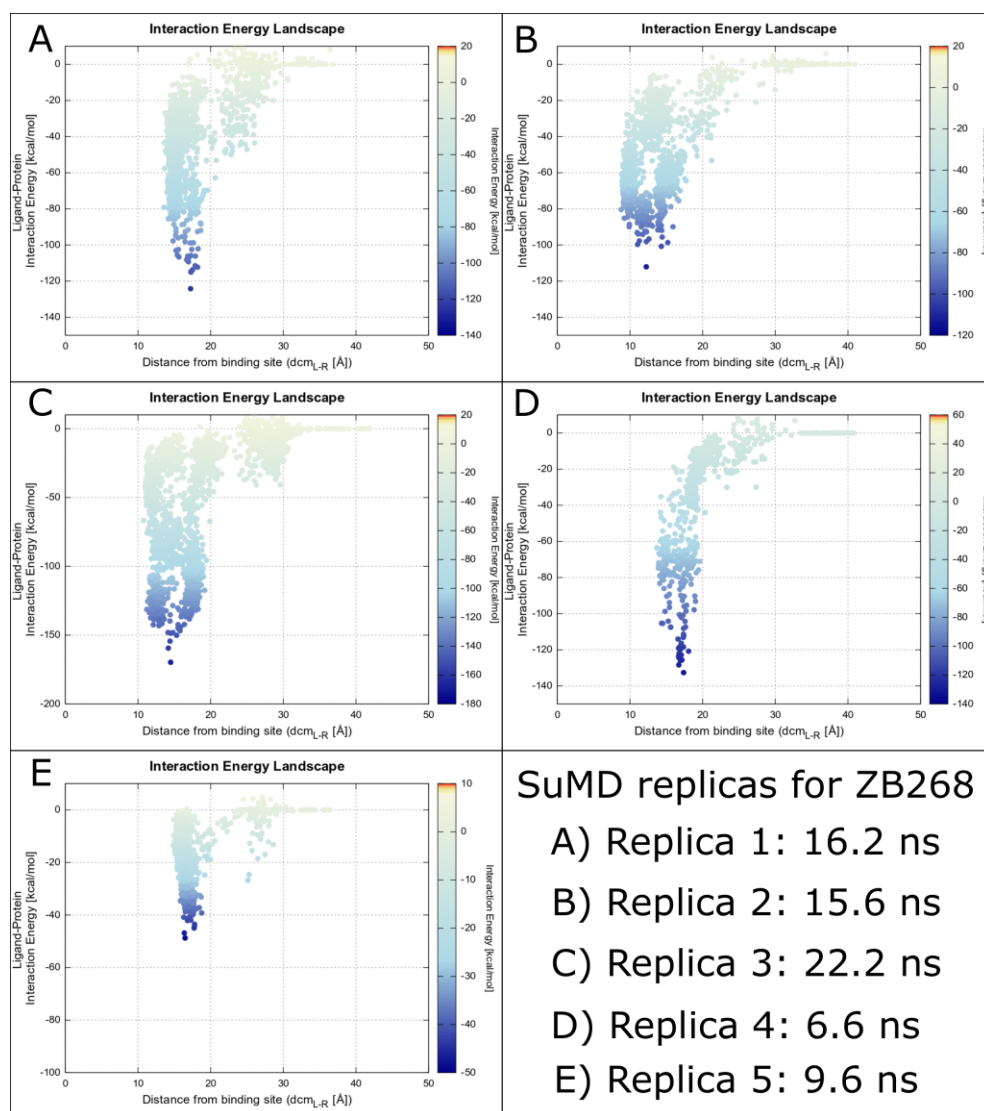

**Figure S8.** ZB268 - A<sub>2A</sub> AR recognition energy landscapes for the five SuMD replicas performed. On the x axis is reported the ligand distance from the orthosteric site, while the y axis shows the intermolecular interaction extracted from the force field (computed every 10 ps of simulation). (A) Replica 1; (B) replica 2; (C) replica 3; (D) replica 4; (E) replica 5.

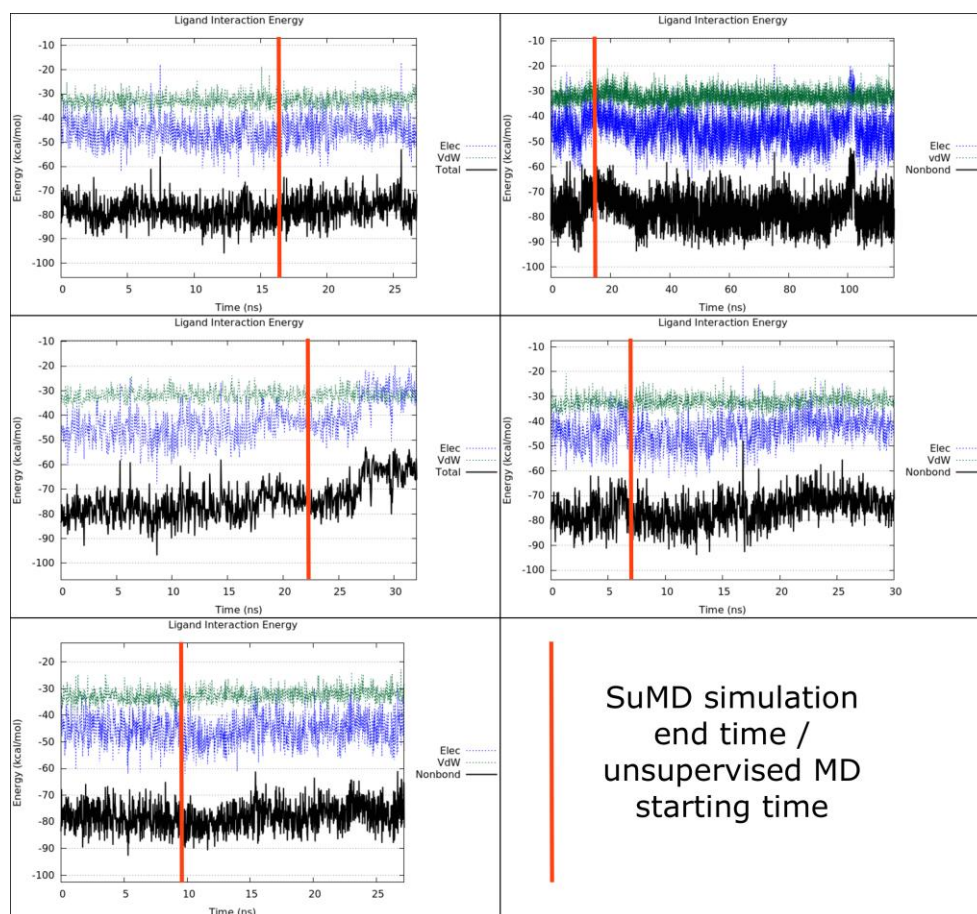

**Figure S9.** NECA - A<sub>2A</sub> AR orthosteric interactions during SUMD and unsupervised MD simulations of ZB268. Red lines indicate the end of the supervision algorithm. (A) Replica 1; (B) replica 2; (C) replica 3; (D) replica 4; (E) replica 5.

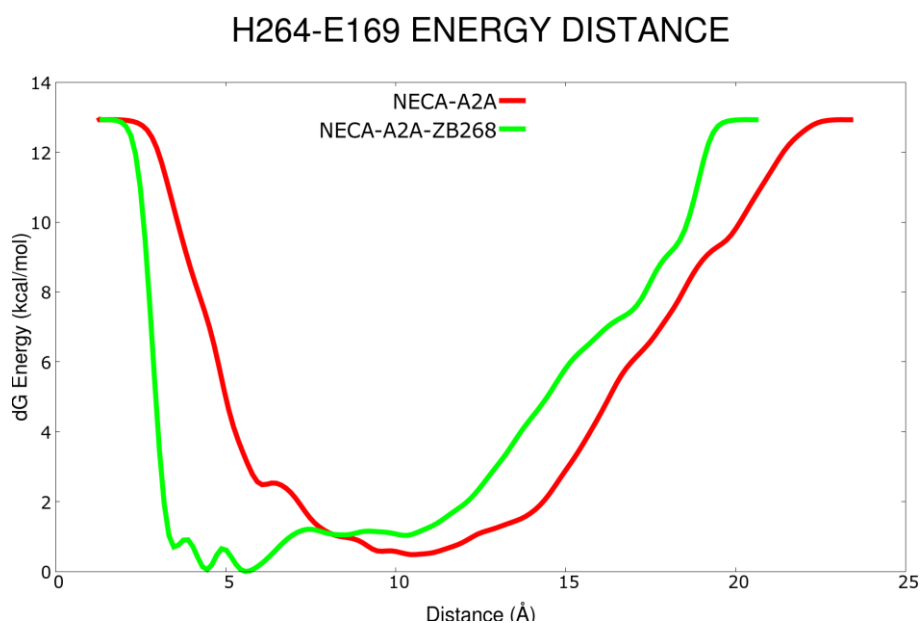

**Figure S10.** Stability of the salt bridge between H264 and E169 according to metadynamics simulations (see Methods section for details). Red line: A<sub>2A</sub> AR holo form (complex with NECA); green line: A<sub>2A</sub> AR holo form with NECA + ZB268 from SuMD replica 5.
