# Supplementary material for: Supporting the Identification of Novel Fragment-Based Positive Allosteric Modulators Using a Supervised Molecular Dynamics Approach: A Retrospective Analysis Considering the Human A2A Adenosine Receptor as a Key Example
Source: Molecules. 2017 May 16;22(5):818. doi: 10.3390/molecules22050818 (PMC6154550; doi:10.3390/molecules22050818)
Supplement: Supplementary file 1 [file molecules-22-00818-s001.zip]

Archive with 4 entries (4 files):
- VideoS1.avi
- VideoS2.avi
- VideoS3.avi
- molecules-186215 supplementary.pdf
